# Supplementary material for: Development of A Radiomic Model for MGMT Promoter Methylation Detection in Glioblastoma Using Conventional MRI
Source: MDPI journal article supplement (doi:10.3390/ijms25010138), 2023-12-21
Supplement: s1 [file s1]

**Supplementary Figure S2.** Comparison of accuracies obtained in the test set by models using radiomic features with or without inclusion of clinical data.

**A SVM**

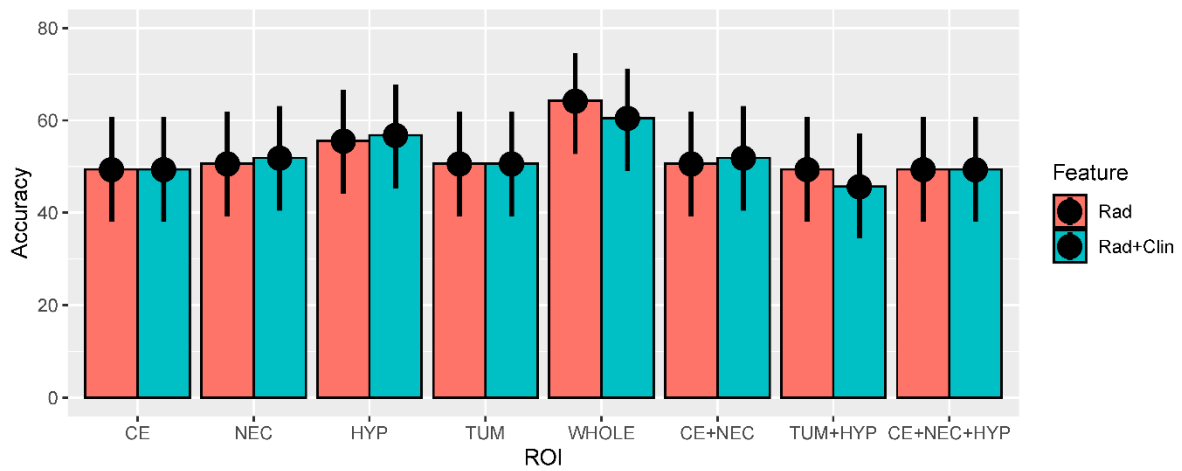

**B RF**

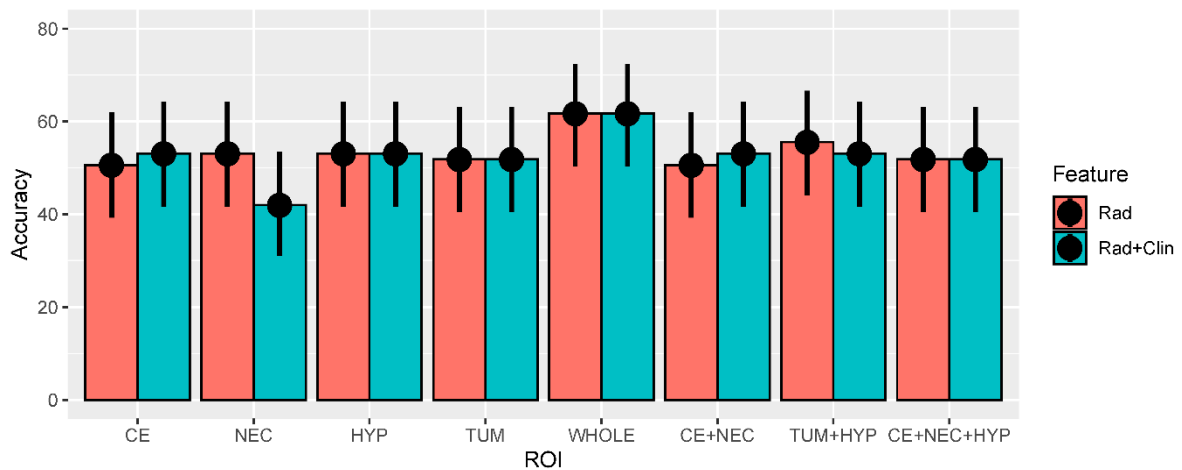

Segments represent 95% confidence intervals. (A) Support Vector Machine. (B) Random Forest.

Abbreviations: SVM = support vector machine; RF = random forest; CE = contrast enhancement; NEC = necrosis; HYP = T2 hyperintensity; TUM = solid tumor; WHOLE = tumor including edema; ROI = region of interest; Rad = radiomic data only; Rad+Clin = radiomic with clinical data.
