# Supplementary material for: Development of A Radiomic Model for MGMT Promoter Methylation Detection in Glioblastoma Using Conventional MRI
Source: MDPI journal article supplement (doi:10.3390/ijms25010138), 2023-12-21
Supplement: s1 [file s1]

**Supplementary Table S3. Summary of classification performances on the training set based on radiomic features extracted from multiple ROIs.**

| Metric                 | CE+NEC           |                  | TUM+HYP          |                  | CE+NEC+HYP       |                  |
|------------------------|------------------|------------------|------------------|------------------|------------------|------------------|
|                        | SVM              | RF               | SVM              | RF               | SVM              | RF               |
| Accuracy, %<br>(SD)    | 71.6<br>(8.5)    | 56.8<br>(7.2)    | 70.4<br>(9.4)    | 61.0<br>(8.4)    | 83.0<br>(5.7)    | 59.4<br>(9.8)    |
| Sensitivity, %<br>(SD) | 60.4<br>(17.7)   | 21.2<br>(10.6)   | 64.3<br>(10.1)   | 34.1<br>(10.7)   | 83.5<br>(8.9)    | 31.4<br>(11.9)   |
| Specificity, %<br>(SD) | 80.2<br>(9.4)    | 84.0<br>(7.7)    | 75.0<br>(12.2)   | 81.6<br>(9.6)    | 82.5<br>(8.3)    | 80.8<br>(11.8)   |
| AUC<br>(SD)            | 0.776<br>(0.085) | 0.565<br>(0.082) | 0.785<br>(0.090) | 0.654<br>(0.122) | 0.894<br>(0.056) | 0.637<br>(0.126) |

Data are reported as mean (SD). Classification metrics were computed on the held-out set for 15 resamples (5-fold cross-validation repeated 3 times) during training. Abbreviations: ROI = region of interest; CE = contrast enhancement; NEC = necrosis; HYP = hyperintensity in FLAIR; TUM = tumor core (union of CE and NEC); SVM = Support Vector Machine; RF = Random Forest; SD = standard deviation; AUC = area under the curve.
