# Supplementary material for: Development of A Radiomic Model for MGMT Promoter Methylation Detection in Glioblastoma Using Conventional MRI
Source: MDPI journal article supplement (doi:10.3390/ijms25010138), 2023-12-21
Supplement: s1 [file s1]

**Supplementary Figure S1.** Comparison of the top 3 selected features for the predictive model based on whole tumor segmentation between MGMT promoter methylated and unmethylated tumors.

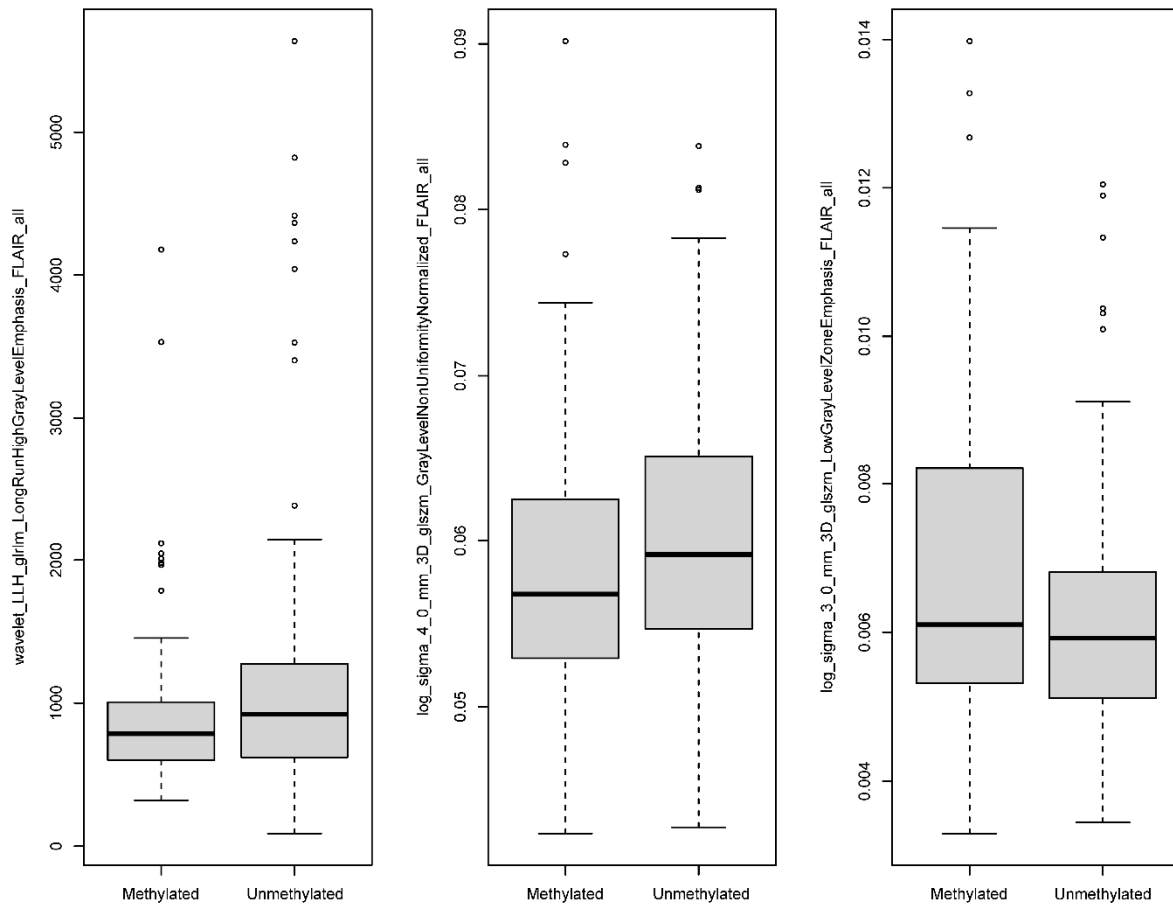

Abbreviations: MGMT = O6-methylguanine-DNA methyltransferase; LoG = Laplacian of Gaussian filter; L = low pass filter; H = high pass filter; FLAIR = fluid attenuated inversion recovery; GLRLM = Gray Level Run Length Matrix; GLSZM = Gray Level Size Zone Matrix.
