# Supplementary material for: Development of A Radiomic Model for MGMT Promoter Methylation Detection in Glioblastoma Using Conventional MRI
Source: MDPI journal article supplement (doi:10.3390/ijms25010138), 2023-12-21
Supplement: s1 [file s1]

**Supplementary Table S4. Summary of classification performances on the test set based on radiomic features extracted from multiple ROIs.**

| Metric                  | CE+NEC                 |                        | TUM+HYP                |                        | CE+NEC+HYP             |                        |
|-------------------------|------------------------|------------------------|------------------------|------------------------|------------------------|------------------------|
|                         | SVM                    | RF                     | SVM                    | RF                     | SVM                    | RF                     |
| Accuracy, %<br>(95% CI) | 50.6<br>(39.3-61.9)    | 50.6<br>(39.3-61.9)    | 49.4<br>(38.1-60.7)    | 55.6<br>(44.1-66.6)    | 49.4<br>(38.1-60.7)    | 51.9<br>(40.5-63.1)    |
| Sensitivity, %<br>(n/N) | 48.6<br>(17/35)        | 17.1<br>(6/35)         | 51.4<br>(18/35)        | 31.4<br>(11/35)        | 42.9<br>(15/35)        | 28.6<br>(10/35)        |
| Specificity, %<br>(n/N) | 52.2<br>(24/46)        | 76.1<br>(35/46)        | 47.8<br>(22/46)        | 73.9<br>(34/46)        | 54.3<br>(25/46)        | 69.6<br>(32/46)        |
| AUC<br>(95% CI)         | 0.555<br>(0.429-0.682) | 0.473<br>(0.344-0.601) | 0.502<br>(0.371-0.634) | 0.547<br>(0.418-0.675) | 0.505<br>(0.377-0.633) | 0.461<br>(0.331-0.591) |

Classification metrics were computed on the 81 patients assigned to the test set. Abbreviations: ROI = region of interest; CE = contrast enhancement; NEC = necrosis; HYP = hyperintensity in FLAIR; TUM = tumor core (union of CE and NEC); SVM = Support Vector Machine; RF = Random Forest; CI = confidence interval; n/N = numerator/denominator; AUC = area under the curve.
