# Supplementary material for: Development of A Radiomic Model for MGMT Promoter Methylation Detection in Glioblastoma Using Conventional MRI
Source: Int J Mol Sci. 2023 Dec 21;25(1):138. doi: 10.3390/ijms25010138 (PMC10778771; doi:10.3390/ijms25010138)
Supplement: Supplementary file 1 [file ijms-25-00138-s001.zip]

Archive with 7 entries (7 files):
- Supplementary Figure S1.pdf
- Supplementary Figure S2.pdf
- Supplementary Table S1.xlsx
- Supplementary Table S2.xlsx
- Supplementary Table S3.pdf
- Supplementary Table S4.pdf
- Supplementary Table S5.xlsx
