# Supplementary material for: Development of A Radiomic Model for MGMT Promoter Methylation Detection in Glioblastoma Using Conventional MRI
Source: Int J Mol Sci. 2023 Dec 21;25(1):138. doi: 10.3390/ijms25010138 (PMC10778771; doi:10.3390/ijms25010138)
Supplement: Supplementary file 1 [file ijms-25-00138-s001.zip › Supplementary Table S1.xlsx]

## Sheet: GLSZM
ID	Feature	CE	NEC	HYP	TUM	WHOLE	TOTAL
120	glszm_LargeAreaHighGrayLevelEmphasis_T1	10	14	9	10	12	55
122	glszm_LargeAreaLowGrayLevelEmphasis_T1	10	14	12	10	9	55
138	glszm_ZoneVariance_T1	10	14	14	7	10	55
119	glszm_LargeAreaHighGrayLevelEmphasis_FLAIR	14	14	10	6	8	52
117	glszm_LargeAreaEmphasis_FLAIR	14	14	8	6	9	51
137	glszm_ZoneVariance_FLAIR	14	14	7	7	6	48
118	glszm_LargeAreaEmphasis_T1	10	14	10	6	7	47
121	glszm_LargeAreaLowGrayLevelEmphasis_FLAIR	12	14	7	5	6	44
125	glszm_LongRunEmphasis_T1	0	0	3	8	4	15
116	glszm_Kurtosis_T1	0	0	4	5	4	13
127	glszm_LongRunHighGrayLevelEmphasis_T1	0	0	3	6	4	13
129	glszm_LongRunLowGrayLevelEmphasis_T1	0	0	2	5	4	11
131	glszm_RunVariance_T1	0	0	1	6	3	10
124	glszm_LongRunEmphasis_FLAIR	0	0	3	3	3	9
128	glszm_LongRunLowGrayLevelEmphasis_FLAIR	0	0	3	1	4	8
130	glszm_RunVariance_FLAIR	0	0	3	2	3	8
108	glszm_DependenceNonUniformity_T1	0	0	2	0	3	5
115	glszm_Kurtosis_FLAIR	0	0	1	3	1	5
126	glszm_LongRunHighGrayLevelEmphasis_FLAIR	0	0	2	2	1	5
132	glszm_Skewness_FLAIR	0	0	1	2	2	5
106	glszm_Correlation_FLAIR	0	0	0	3	1	4
133	glszm_Skewness_T1	0	0	1	2	1	4
107	glszm_DependenceNonUniformity_FLAIR	0	0	1	0	2	3
135	glszm_TotalEnergy_FLAIR	0	0	1	1	1	3
101	glszm_ClusterProminence_FLAIR	0	0	1	1	0	2
109	glszm_Energy_FLAIR	0	0	0	1	1	2
114	glszm_JointEnergy_T1	0	0	0	2	0	2
136	glszm_TotalEnergy_T1	0	0	2	0	0	2
102	glszm_ClusterShade_T1	0	0	1	0	0	1
103	glszm_Coarseness_FLAIR	0	0	0	0	1	1
104	glszm_Coarseness_T1	0	0	0	0	1	1
105	glszm_Contrast_FLAIR	0	0	0	0	1	1
110	glszm_GrayLevelNonUniformity_FLAIR	0	0	1	0	0	1
111	glszm_GrayLevelNonUniformityNormalized_T1	0	1	0	0	0	1
112	glszm_Imc2_FLAIR	0	0	0	1	0	1
113	glszm_JointEnergy_FLAIR	0	0	0	1	0	1
123	glszm_LargeDependenceLowGrayLevelEmphasis_FLAIR	0	0	0	1	0	1
134	glszm_Strength_T1	0	0	0	0	1	1

## Sheet: GLRLM
ID	Feature	CE	NEC	HYP	TUM	WHOLE	TOTAL
95	glrlm_RunVariance_T1	4	3	2	0	2	11
88	glrlm_LongRunEmphasis_FLAIR	4	3	1	0	2	10
92	glrlm_LongRunLowGrayLevelEmphasis_FLAIR	4	4	2	0	0	10
94	glrlm_RunVariance_FLAIR	5	3	1	1	0	10
90	glrlm_LongRunHighGrayLevelEmphasis_FLAIR	4	2	1	0	2	9
93	glrlm_LongRunLowGrayLevelEmphasis_T1	4	2	2	0	1	9
89	glrlm_LongRunEmphasis_T1	4	2	0	0	0	6
91	glrlm_LongRunHighGrayLevelEmphasis_T1	4	2	0	0	0	6
82	glrlm_LargeAreaEmphasis_FLAIR	0	0	2	3	0	5
83	glrlm_LargeAreaEmphasis_T1	0	0	2	1	2	5
84	glrlm_LargeAreaHighGrayLevelEmphasis_FLAIR	0	0	0	3	2	5
80	glrlm_Kurtosis_FLAIR	0	0	2	0	2	4
87	glrlm_LargeAreaLowGrayLevelEmphasis_T1	0	0	1	2	1	4
100	glrlm_ZoneVariance_T1	0	0	0	3	1	4
81	glrlm_Kurtosis_T1	0	0	0	2	1	3
85	glrlm_LargeAreaHighGrayLevelEmphasis_T1	0	0	2	0	1	3
99	glrlm_ZoneVariance_FLAIR	0	0	0	1	2	3
78	glrlm_Correlation_T1	0	0	0	2	0	2
79	glrlm_DependenceNonUniformity_FLAIR	0	0	1	0	1	2
86	glrlm_LargeAreaLowGrayLevelEmphasis_FLAIR	0	0	0	1	1	2
96	glrlm_Skewness_FLAIR	0	0	1	1	0	2
97	glrlm_TotalEnergy_FLAIR	0	0	1	0	0	1
98	glrlm_Variance_FLAIR	0	0	0	1	0	1

## Sheet: First_Order
ID	Feature	CE	NEC	HYP	TUM	WHOLE	TOTAL
8	firstorder_LargeAreaHighGrayLevelEmphasis_FLAIR	0	0	3	3	4	10
22	firstorder_TotalEnergy_FLAIR	3	6	0	0	0	9
4	firstorder_Kurtosis_FLAIR	4	3	1	0	1	9
25	firstorder_ZoneVariance_FLAIR	0	0	3	3	2	8
10	firstorder_LargeAreaLowGrayLevelEmphasis_FLAIR	0	0	3	2	3	8
20	firstorder_Skewness_FLAIR	3	2	1	0	1	7
6	firstorder_LargeAreaEmphasis_FLAIR	0	0	2	3	2	7
18	firstorder_RunVariance_FLAIR	0	0	2	2	2	6
24	firstorder_Variance_FLAIR	1	4	0	0	0	5
5	firstorder_Kurtosis_T1	4	1	0	0	0	5
15	firstorder_LongRunLowGrayLevelEmphasis_FLAIR	0	0	1	2	1	4
13	firstorder_LongRunHighGrayLevelEmphasis_FLAIR	0	0	1	2	1	4
23	firstorder_TotalEnergy_T1	1	1	1	0	0	3
21	firstorder_Skewness_T1	1	1	1	0	0	3
17	firstorder_Median_FLAIR	0	3	0	0	0	3
12	firstorder_LongRunEmphasis_FLAIR	0	0	1	1	1	3
3	firstorder_Energy_FLAIR	1	1	0	0	0	2
1	firstorder_DependenceNonUniformity_FLAIR	0	0	1	0	1	2
26	firstorder_ZoneVariance_T1	0	0	0	1	0	1
19	firstorder_RunVariance_T1	0	0	0	1	0	1
16	firstorder_LongRunLowGrayLevelEmphasis_T1	0	0	0	1	0	1
14	firstorder_LongRunHighGrayLevelEmphasis_T1	0	0	0	1	0	1
11	firstorder_LargeAreaLowGrayLevelEmphasis_T1	0	0	0	0	1	1
9	firstorder_LargeAreaHighGrayLevelEmphasis_T1	0	0	0	0	1	1
7	firstorder_LargeAreaEmphasis_T1	0	0	0	0	1	1
2	firstorder_DependenceNonUniformity_T1	0	0	1	0	0	1

## Sheet: GLCM
ID	Feature	CE	NEC	HYP	TUM	WHOLE	TOTAL
31	glcm_Correlation_FLAIR	2	4	0	0	1	7
40	glcm_LargeAreaEmphasis_T1	0	0	1	4	2	7
36	glcm_JointEnergy_T1	4	2	0	0	0	6
42	glcm_LargeAreaHighGrayLevelEmphasis_T1	0	0	0	4	1	5
43	glcm_LargeAreaLowGrayLevelEmphasis_FLAIR	0	0	1	3	1	5
54	glcm_ZoneVariance_FLAIR	0	0	2	1	2	5
29	glcm_ClusterShade_FLAIR	0	4	0	0	0	4
32	glcm_Correlation_T1	0	4	0	0	0	4
48	glcm_LongRunHighGrayLevelEmphasis_T1	0	0	2	1	1	4
30	glcm_ClusterShade_T1	0	2	1	0	0	3
41	glcm_LargeAreaHighGrayLevelEmphasis_FLAIR	0	0	1	2	0	3
46	glcm_LongRunEmphasis_T1	0	0	2	0	1	3
37	glcm_Kurtosis_FLAIR	0	0	1	0	1	2
39	glcm_LargeAreaEmphasis_FLAIR	0	0	1	1	0	2
44	glcm_LargeAreaLowGrayLevelEmphasis_T1	0	0	0	1	1	2
52	glcm_RunVariance_T1	0	0	1	0	1	2
55	glcm_ZoneVariance_T1	0	0	0	0	2	2
27	glcm_ClusterProminence_FLAIR	1	0	0	0	0	1
28	glcm_ClusterProminence_T1	0	1	0	0	0	1
33	glcm_GrayLevelNonUniformity_FLAIR	0	0	1	0	0	1
34	glcm_Imc2_FLAIR	1	0	0	0	0	1
35	glcm_JointEnergy_FLAIR	1	0	0	0	0	1
38	glcm_Kurtosis_T1	0	0	1	0	0	1
45	glcm_LongRunEmphasis_FLAIR	0	0	1	0	0	1
47	glcm_LongRunHighGrayLevelEmphasis_FLAIR	0	0	0	0	1	1
49	glcm_LongRunLowGrayLevelEmphasis_FLAIR	0	0	0	0	1	1
50	glcm_LongRunLowGrayLevelEmphasis_T1	0	0	1	0	0	1
51	glcm_MaximumProbability_T1	1	0	0	0	0	1
53	glcm_Skewness_FLAIR	0	0	0	0	1	1

## Sheet: GLDM
ID	Feature	CE	NEC	HYP	TUM	WHOLE	TOTAL
77	gldm_ZoneVariance_FLAIR	0	0	2	1	2	5
62	gldm_LargeAreaEmphasis_FLAIR	0	0	1	0	3	4
65	gldm_LargeAreaLowGrayLevelEmphasis_FLAIR	0	0	1	1	1	3
68	gldm_LargeDependenceHighGrayLevelEmphasis_T1	3	0	0	0	0	3
69	gldm_LargeDependenceLowGrayLevelEmphasis_FLAIR	1	2	0	0	0	3
74	gldm_SmallDependenceLowGrayLevelEmphasis_FLAIR	0	3	0	0	0	3
59	gldm_GrayLevelNonUniformity_FLAIR	0	2	0	0	0	2
63	gldm_LargeAreaEmphasis_T1	0	0	1	0	1	2
66	gldm_LargeAreaLowGrayLevelEmphasis_T1	0	0	1	1	0	2
70	gldm_LargeDependenceLowGrayLevelEmphasis_T1	2	0	0	0	0	2
75	gldm_SmallDependenceLowGrayLevelEmphasis_T1	0	2	0	0	0	2
76	gldm_TotalEnergy_FLAIR	0	0	0	2	0	2
56	gldm_ClusterProminence_FLAIR	0	0	0	0	1	1
57	gldm_DependenceNonUniformity_FLAIR	0	0	1	0	0	1
58	gldm_Energy_FLAIR	0	0	1	0	0	1
60	gldm_Kurtosis_FLAIR	0	0	0	1	0	1
61	gldm_Kurtosis_T1	0	0	0	1	0	1
64	gldm_LargeAreaHighGrayLevelEmphasis_T1	0	0	1	0	0	1
67	gldm_LargeDependenceEmphasis_T1	1	0	0	0	0	1
71	gldm_LongRunLowGrayLevelEmphasis_FLAIR	0	0	0	1	0	1
72	gldm_LongRunLowGrayLevelEmphasis_T1	0	0	0	1	0	1
73	gldm_RunVariance_FLAIR	0	0	0	0	1	1
