# Supplementary material for: Development of A Radiomic Model for MGMT Promoter Methylation Detection in Glioblastoma Using Conventional MRI
Source: Int J Mol Sci. 2023 Dec 21;25(1):138. doi: 10.3390/ijms25010138 (PMC10778771; doi:10.3390/ijms25010138)
Supplement: Supplementary file 1 [file ijms-25-00138-s001.zip › Supplementary Table S2.xlsx]

## Sheet: Sheet 1
Feature name	WHOLE	CE	NEC	HYP	TUM	Row Sum
wavelet_HHH_firstorder_Mean_FLAIR	1	1	1	0	1	4
original_shape_Elongation_T1	1	0	0	1	1	3
wavelet_LLH_glcm_Correlation_T1	1	1	0	1	0	3
log_sigma_1_0_mm_3D_firstorder_Skewness_T1	1	1	0	0	1	3
log_sigma_3_0_mm_3D_glszm_LowGrayLevelZoneEmphasis_FLAIR	1	0	0	1	1	3
wavelet_HLH_firstorder_Skewness_T1	1	0	0	1	1	3
wavelet_HLL_glcm_ClusterShade_FLAIR	1	0	0	1	1	3
log_sigma_5_0_mm_3D_glszm_SizeZoneNonUniformityNormalized_T1	1	1	0	1	0	3
wavelet_HHH_glszm_SizeZoneNonUniformity_T1	1	1	0	0	1	3
log_sigma_5_0_mm_3D_glszm_GrayLevelVariance_FLAIR	1	1	0	0	0	2
wavelet_HLL_glcm_Imc1_FLAIR	1	0	0	0	1	2
wavelet_LHL_firstorder_Skewness_T1	1	0	0	1	0	2
log_sigma_4_0_mm_3D_glszm_GrayLevelNonUniformityNormalized_FLAIR	1	0	0	1	0	2
log_sigma_5_0_mm_3D_glszm_SmallAreaLowGrayLevelEmphasis_FLAIR	1	0	0	0	1	2
original_glcm_ClusterProminence_FLAIR	1	0	1	0	0	2
original_shape_Maximum2DDiameterSlice_T1	1	0	0	1	0	2
wavelet_HHH_firstorder_Mean_T1	1	0	0	1	0	2
wavelet_HHH_glcm_Correlation_T1	1	0	0	1	0	2
wavelet_HLL_firstorder_Skewness_T1	1	0	0	0	1	2
wavelet_LHH_firstorder_Maximum_T1	1	0	0	0	1	2
wavelet_LHH_glrlm_GrayLevelVariance_FLAIR	1	0	0	1	0	2
wavelet_LLH_firstorder_Skewness_T1	1	0	1	0	0	2
wavelet_LLH_glcm_ClusterShade_FLAIR	1	0	0	1	0	2
wavelet_LLL_glszm_HighGrayLevelZoneEmphasis_FLAIR	1	0	1	0	0	2
log_sigma_5_0_mm_3D_glszm_SizeZoneNonUniformity_T1	1	0	1	0	0	2
original_glcm_ClusterShade_FLAIR	1	0	0	1	0	2
original_glcm_Imc1_T1	1	0	0	1	0	2
wavelet_HHH_glszm_LowGrayLevelZoneEmphasis_FLAIR	1	0	0	1	0	2
wavelet_HHH_glszm_SizeZoneNonUniformity_FLAIR	1	1	0	0	0	2
wavelet_HHL_firstorder_Mean_T1	1	0	0	0	1	2
wavelet_HLH_firstorder_Maximum_FLAIR	1	0	0	0	1	2
wavelet_HLH_firstorder_Median_T1	1	0	0	0	1	2
wavelet_LHH_glszm_SmallAreaHighGrayLevelEmphasis_FLAIR	1	0	0	1	0	2
wavelet_LHL_firstorder_Kurtosis_T1	1	0	0	1	0	2
wavelet_LLH_firstorder_Kurtosis_FLAIR	1	0	0	1	0	2
wavelet_LLH_firstorder_Variance_FLAIR	1	0	1	0	0	2
log_sigma_2_0_mm_3D_gldm_DependenceNonUniformityNormalized_T1	1	0	0	1	0	2
log_sigma_3_0_mm_3D_glrlm_LongRunLowGrayLevelEmphasis_T1	1	0	0	0	1	2
log_sigma_3_0_mm_3D_glszm_ZoneEntropy_FLAIR	1	0	0	0	1	2
log_sigma_4_0_mm_3D_glszm_LowGrayLevelZoneEmphasis_T1	1	0	0	1	0	2
log_sigma_4_0_mm_3D_glszm_SmallAreaEmphasis_FLAIR	1	0	0	0	1	2
log_sigma_5_0_mm_3D_glszm_LowGrayLevelZoneEmphasis_T1	1	0	0	1	0	2
wavelet_HHH_gldm_LargeDependenceLowGrayLevelEmphasis_FLAIR	1	0	0	0	1	2
wavelet_HHL_glcm_MaximumProbability_T1	1	0	0	0	1	2
wavelet_HLH_glcm_ClusterShade_FLAIR	1	0	0	0	1	2
wavelet_HLL_glcm_InverseVariance_T1	1	0	0	0	1	2
wavelet_LHL_firstorder_Minimum_T1	1	1	0	0	0	2
wavelet_LLH_firstorder_90Percentile_FLAIR	1	0	0	1	0	2
wavelet_LLH_glrlm_LongRunHighGrayLevelEmphasis_FLAIR	1	0	0	1	0	2
wavelet_LLH_glrlm_ShortRunLowGrayLevelEmphasis_T1	1	0	0	0	1	2
wavelet_LLL_glszm_ZoneEntropy_T1	1	0	0	0	1	2
log_sigma_1_0_mm_3D_firstorder_Maximum_T1	1	0	0	0	0	1
log_sigma_5_0_mm_3D_glszm_GrayLevelNonUniformity_FLAIR	1	0	0	0	0	1
log_sigma_5_0_mm_3D_glszm_GrayLevelNonUniformityNormalized_FLAIR	1	0	0	0	0	1
wavelet_HLL_glcm_InverseVariance_FLAIR	1	0	0	0	0	1
wavelet_LHH_glrlm_RunEntropy_FLAIR	1	0	0	0	0	1
log_sigma_1_0_mm_3D_glcm_InverseVariance_FLAIR	1	0	0	0	0	1
log_sigma_1_0_mm_3D_glszm_SmallAreaHighGrayLevelEmphasis_FLAIR	1	0	0	0	0	1
log_sigma_2_0_mm_3D_firstorder_Maximum_T1	1	0	0	0	0	1
log_sigma_4_0_mm_3D_glszm_LowGrayLevelZoneEmphasis_FLAIR	1	0	0	0	0	1
log_sigma_5_0_mm_3D_gldm_SmallDependenceHighGrayLevelEmphasis_T1	1	0	0	0	0	1
log_sigma_5_0_mm_3D_glszm_GrayLevelNonUniformityNormalized_T1	1	0	0	0	0	1
original_glcm_Correlation_T1	1	0	0	0	0	1
wavelet_HHH_glrlm_RunEntropy_FLAIR	1	0	0	0	0	1
wavelet_HHL_firstorder_Mean_FLAIR	1	0	0	0	0	1
wavelet_HLH_glcm_ClusterProminence_T1	1	0	0	0	0	1
wavelet_HLH_gldm_LowGrayLevelEmphasis_T1	1	0	0	0	0	1
wavelet_LHL_glszm_SmallAreaHighGrayLevelEmphasis_T1	1	0	0	0	0	1
log_sigma_1_0_mm_3D_gldm_DependenceNonUniformity_T1	1	0	0	0	0	1
log_sigma_1_0_mm_3D_glrlm_HighGrayLevelRunEmphasis_T1	1	0	0	0	0	1
log_sigma_1_0_mm_3D_glszm_ZoneEntropy_T1	1	0	0	0	0	1
log_sigma_2_0_mm_3D_glrlm_RunEntropy_T1	1	0	0	0	0	1
log_sigma_3_0_mm_3D_glszm_GrayLevelNonUniformity_FLAIR	1	0	0	0	0	1
log_sigma_3_0_mm_3D_glszm_GrayLevelVariance_T1	1	0	0	0	0	1
log_sigma_3_0_mm_3D_ngtdm_Complexity_T1	1	0	0	0	0	1
log_sigma_4_0_mm_3D_firstorder_90Percentile_FLAIR	1	0	0	0	0	1
log_sigma_4_0_mm_3D_glcm_Correlation_FLAIR	1	0	0	0	0	1
log_sigma_4_0_mm_3D_glcm_Correlation_T1	1	0	0	0	0	1
log_sigma_4_0_mm_3D_glcm_InverseVariance_T1	1	0	0	0	0	1
log_sigma_4_0_mm_3D_glcm_MaximumProbability_FLAIR	1	0	0	0	0	1
log_sigma_4_0_mm_3D_glrlm_GrayLevelVariance_FLAIR	1	0	0	0	0	1
log_sigma_4_0_mm_3D_glrlm_HighGrayLevelRunEmphasis_FLAIR	1	0	0	0	0	1
log_sigma_4_0_mm_3D_glszm_GrayLevelNonUniformity_FLAIR	1	0	0	0	0	1
log_sigma_4_0_mm_3D_glszm_LargeAreaLowGrayLevelEmphasis_T1	1	0	0	0	0	1
log_sigma_5_0_mm_3D_firstorder_10Percentile_T1	1	0	0	0	0	1
log_sigma_5_0_mm_3D_firstorder_MeanAbsoluteDeviation_FLAIR	1	0	0	0	0	1
log_sigma_5_0_mm_3D_firstorder_Median_T1	1	0	0	0	0	1
log_sigma_5_0_mm_3D_ngtdm_Complexity_FLAIR	1	0	0	0	0	1
original_firstorder_10Percentile_T1	1	0	0	0	0	1
original_firstorder_Median_FLAIR	1	0	0	0	0	1
original_glszm_SizeZoneNonUniformityNormalized_FLAIR	1	0	0	0	0	1
original_glszm_SmallAreaEmphasis_FLAIR	1	0	0	0	0	1
original_shape_MajorAxisLength_T1	1	0	0	0	0	1
wavelet_HHH_firstorder_TotalEnergy_T1	1	0	0	0	0	1
wavelet_HHH_gldm_LargeDependenceLowGrayLevelEmphasis_T1	1	0	0	0	0	1
wavelet_HHH_glrlm_LowGrayLevelRunEmphasis_FLAIR	1	0	0	0	0	1
wavelet_HHH_glszm_GrayLevelNonUniformityNormalized_FLAIR	1	0	0	0	0	1
wavelet_HHH_glszm_SmallAreaLowGrayLevelEmphasis_T1	1	0	0	0	0	1
wavelet_HHL_glrlm_HighGrayLevelRunEmphasis_FLAIR	1	0	0	0	0	1
wavelet_HHL_ngtdm_Busyness_T1	1	0	0	0	0	1
wavelet_HLH_firstorder_10Percentile_T1	1	0	0	0	0	1
wavelet_HLH_glrlm_RunEntropy_T1	1	0	0	0	0	1
wavelet_HLH_glszm_ZoneEntropy_FLAIR	1	0	0	0	0	1
wavelet_HLH_ngtdm_Busyness_FLAIR	1	0	0	0	0	1
wavelet_HLH_ngtdm_Coarseness_FLAIR	1	0	0	0	0	1
wavelet_HLH_ngtdm_Coarseness_T1	1	0	0	0	0	1
wavelet_HLL_firstorder_Kurtosis_T1	1	0	0	0	0	1
wavelet_HLL_firstorder_Variance_FLAIR	1	0	0	0	0	1
wavelet_HLL_glcm_Imc2_FLAIR	1	0	0	0	0	1
wavelet_HLL_gldm_DependenceVariance_FLAIR	1	0	0	0	0	1
wavelet_HLL_glrlm_LongRunHighGrayLevelEmphasis_T1	1	0	0	0	0	1
wavelet_LHH_firstorder_Range_T1	1	0	0	0	0	1
wavelet_LHH_glcm_ClusterTendency_FLAIR	1	0	0	0	0	1
wavelet_LHH_glcm_InverseVariance_T1	1	0	0	0	0	1
wavelet_LHH_glcm_SumSquares_FLAIR	1	0	0	0	0	1
wavelet_LHH_gldm_DependenceVariance_FLAIR	1	0	0	0	0	1
wavelet_LHH_gldm_LargeDependenceLowGrayLevelEmphasis_FLAIR	1	0	0	0	0	1
wavelet_LHH_glszm_GrayLevelNonUniformity_T1	1	0	0	0	0	1
wavelet_LHL_firstorder_Skewness_FLAIR	1	0	0	0	0	1
wavelet_LHL_glcm_Imc2_T1	1	0	0	0	0	1
wavelet_LHL_glcm_InverseVariance_T1	1	0	0	0	0	1
wavelet_LHL_gldm_DependenceNonUniformityNormalized_T1	1	0	0	0	0	1
wavelet_LLH_firstorder_Median_T1	1	0	0	0	0	1
wavelet_LLH_firstorder_Minimum_T1	1	0	0	0	0	1
wavelet_LLH_firstorder_Variance_T1	1	0	0	0	0	1
wavelet_LLH_gldm_SmallDependenceLowGrayLevelEmphasis_T1	1	0	0	0	0	1
wavelet_LLH_glrlm_LongRunHighGrayLevelEmphasis_T1	1	0	0	0	0	1
wavelet_LLH_glszm_SizeZoneNonUniformity_T1	1	0	0	0	0	1
wavelet_LLL_firstorder_10Percentile_T1	1	0	0	0	0	1
wavelet_LLL_glcm_ClusterShade_T1	1	0	0	0	0	1
wavelet_LLL_gldm_LargeDependenceHighGrayLevelEmphasis_T1	1	0	0	0	0	1
wavelet_LLL_glszm_GrayLevelVariance_FLAIR	1	0	0	0	0	1
wavelet_HHL_firstorder_Skewness_T1	0	1	0	1	1	3
original_firstorder_Kurtosis_FLAIR	0	1	0	1	1	3
wavelet_LHL_glcm_ClusterShade_FLAIR	0	1	0	1	1	3
log_sigma_1_0_mm_3D_firstorder_Minimum_FLAIR	0	1	1	0	0	2
log_sigma_3_0_mm_3D_gldm_LargeDependenceHighGrayLevelEmphasis_FLAIR	0	1	0	0	1	2
log_sigma_4_0_mm_3D_glcm_ClusterProminence_T1	0	0	1	1	0	2
wavelet_HHH_gldm_DependenceNonUniformity_T1	0	1	0	0	1	2
wavelet_HLH_glcm_Imc1_T1	0	1	0	0	1	2
wavelet_HLH_glszm_SmallAreaHighGrayLevelEmphasis_T1	0	0	1	1	0	2
wavelet_LHL_glszm_HighGrayLevelZoneEmphasis_T1	0	1	0	0	1	2
log_sigma_1_0_mm_3D_firstorder_Kurtosis_T1	0	0	1	1	0	2
log_sigma_1_0_mm_3D_glcm_Imc1_T1	0	0	0	1	1	2
original_glszm_GrayLevelNonUniformityNormalized_FLAIR	0	1	0	0	1	2
wavelet_HHH_firstorder_Median_T1	0	0	0	1	1	2
wavelet_HLH_firstorder_Mean_FLAIR	0	1	0	0	1	2
wavelet_HLH_glszm_HighGrayLevelZoneEmphasis_T1	0	0	1	1	0	2
wavelet_LHH_glcm_ClusterShade_FLAIR	0	0	0	1	1	2
wavelet_LHH_glrlm_HighGrayLevelRunEmphasis_FLAIR	0	0	1	0	1	2
wavelet_LLH_firstorder_Kurtosis_T1	0	1	0	0	1	2
wavelet_LLH_firstorder_Mean_FLAIR	0	0	0	1	1	2
wavelet_LLH_glcm_ClusterShade_T1	0	1	0	1	0	2
log_sigma_4_0_mm_3D_glszm_GrayLevelNonUniformityNormalized_T1	0	0	1	1	0	2
log_sigma_5_0_mm_3D_glszm_LowGrayLevelZoneEmphasis_FLAIR	0	0	0	1	1	2
original_firstorder_Minimum_FLAIR	0	1	0	0	1	2
wavelet_HHH_glcm_ClusterShade_T1	0	0	0	1	1	2
wavelet_LHH_gldm_DependenceEntropy_T1	0	1	0	0	1	2
wavelet_LLH_firstorder_10Percentile_FLAIR	0	1	0	0	1	2
wavelet_LLH_firstorder_Skewness_FLAIR	0	0	0	1	1	2
wavelet_LLL_glszm_GrayLevelNonUniformity_FLAIR	0	1	0	0	1	2
log_sigma_2_0_mm_3D_glszm_LowGrayLevelZoneEmphasis_FLAIR	0	0	0	1	1	2
log_sigma_3_0_mm_3D_gldm_LargeDependenceLowGrayLevelEmphasis_T1	0	0	0	1	1	2
original_gldm_LargeDependenceLowGrayLevelEmphasis_FLAIR	0	0	0	1	1	2
wavelet_HHH_gldm_DependenceVariance_T1	0	0	0	1	1	2
wavelet_HLH_glszm_GrayLevelVariance_FLAIR	0	1	0	0	1	2
wavelet_LHL_glszm_SizeZoneNonUniformity_FLAIR	0	1	0	0	1	2
wavelet_LLH_glrlm_LongRunLowGrayLevelEmphasis_FLAIR	0	1	0	1	0	2
log_sigma_3_0_mm_3D_glszm_SmallAreaLowGrayLevelEmphasis_T1	0	0	1	0	0	1
wavelet_HLL_glszm_LowGrayLevelZoneEmphasis_T1	0	0	0	0	1	1
wavelet_LLH_firstorder_RootMeanSquared_FLAIR	0	0	1	0	0	1
log_sigma_1_0_mm_3D_glszm_SizeZoneNonUniformity_FLAIR	0	0	0	1	0	1
log_sigma_2_0_mm_3D_firstorder_Skewness_T1	0	0	0	0	1	1
log_sigma_2_0_mm_3D_glcm_Imc2_FLAIR	0	0	1	0	0	1
log_sigma_2_0_mm_3D_gldm_LargeDependenceLowGrayLevelEmphasis_FLAIR	0	0	0	1	0	1
log_sigma_2_0_mm_3D_glszm_GrayLevelVariance_T1	0	1	0	0	0	1
log_sigma_2_0_mm_3D_glszm_SmallAreaHighGrayLevelEmphasis_T1	0	0	0	1	0	1
log_sigma_4_0_mm_3D_glcm_Imc2_FLAIR	0	0	0	1	0	1
log_sigma_4_0_mm_3D_glszm_GrayLevelVariance_FLAIR	0	0	1	0	0	1
log_sigma_5_0_mm_3D_firstorder_Kurtosis_FLAIR	0	0	1	0	0	1
log_sigma_5_0_mm_3D_glrlm_ShortRunHighGrayLevelEmphasis_T1	0	0	0	1	0	1
original_glszm_GrayLevelNonUniformityNormalized_T1	0	0	0	1	0	1
original_glszm_SmallAreaHighGrayLevelEmphasis_FLAIR	0	0	0	0	1	1
wavelet_HHH_gldm_DependenceNonUniformityNormalized_FLAIR	0	0	0	1	0	1
wavelet_HHH_glszm_HighGrayLevelZoneEmphasis_FLAIR	0	0	0	1	0	1
wavelet_HHL_glszm_SizeZoneNonUniformityNormalized_FLAIR	0	0	0	1	0	1
wavelet_HLH_firstorder_Median_FLAIR	0	0	0	0	1	1
wavelet_HLH_firstorder_Skewness_FLAIR	0	0	0	1	0	1
wavelet_HLH_glrlm_ShortRunHighGrayLevelEmphasis_T1	0	0	0	1	0	1
wavelet_HLH_glszm_SizeZoneNonUniformity_FLAIR	0	0	0	1	0	1
wavelet_HLH_glszm_SmallAreaLowGrayLevelEmphasis_FLAIR	0	0	0	1	0	1
wavelet_HLL_gldm_LowGrayLevelEmphasis_FLAIR	0	0	0	1	0	1
wavelet_HLL_glrlm_RunVariance_FLAIR	0	0	1	0	0	1
wavelet_HLL_glszm_GrayLevelVariance_T1	0	0	1	0	0	1
wavelet_HLL_glszm_SmallAreaLowGrayLevelEmphasis_T1	0	0	0	0	1	1
wavelet_LHH_firstorder_Mean_T1	0	0	0	1	0	1
wavelet_LHH_glrlm_ShortRunHighGrayLevelEmphasis_T1	0	1	0	0	0	1
wavelet_LLH_firstorder_Mean_T1	0	0	0	1	0	1
wavelet_LLL_glszm_GrayLevelVariance_T1	0	1	0	0	0	1
wavelet_LLL_glszm_SmallAreaHighGrayLevelEmphasis_FLAIR	0	1	0	0	0	1
log_sigma_1_0_mm_3D_glcm_ClusterShade_FLAIR	0	0	0	0	1	1
log_sigma_1_0_mm_3D_glrlm_LongRunHighGrayLevelEmphasis_FLAIR	0	0	0	1	0	1
log_sigma_1_0_mm_3D_glrlm_ShortRunHighGrayLevelEmphasis_FLAIR	0	0	0	0	1	1
log_sigma_2_0_mm_3D_glcm_ClusterShade_FLAIR	0	0	0	1	0	1
log_sigma_2_0_mm_3D_glrlm_LongRunHighGrayLevelEmphasis_T1	0	0	0	1	0	1
log_sigma_2_0_mm_3D_glrlm_ShortRunHighGrayLevelEmphasis_T1	0	1	0	0	0	1
log_sigma_2_0_mm_3D_glszm_GrayLevelNonUniformityNormalized_FLAIR	0	0	1	0	0	1
log_sigma_2_0_mm_3D_glszm_SmallAreaLowGrayLevelEmphasis_FLAIR	0	0	0	1	0	1
log_sigma_3_0_mm_3D_glrlm_LongRunHighGrayLevelEmphasis_T1	0	1	0	0	0	1
log_sigma_3_0_mm_3D_glszm_HighGrayLevelZoneEmphasis_FLAIR	0	0	0	1	0	1
log_sigma_3_0_mm_3D_glszm_LowGrayLevelZoneEmphasis_T1	0	0	0	0	1	1
log_sigma_3_0_mm_3D_glszm_SmallAreaLowGrayLevelEmphasis_FLAIR	0	1	0	0	0	1
log_sigma_4_0_mm_3D_firstorder_Kurtosis_T1	0	0	0	1	0	1
log_sigma_4_0_mm_3D_gldm_DependenceVariance_FLAIR	0	0	0	1	0	1
log_sigma_4_0_mm_3D_gldm_LowGrayLevelEmphasis_FLAIR	0	1	0	0	0	1
log_sigma_4_0_mm_3D_glszm_SmallAreaHighGrayLevelEmphasis_FLAIR	0	0	0	1	0	1
log_sigma_4_0_mm_3D_glszm_ZoneVariance_T1	0	0	0	0	1	1
log_sigma_5_0_mm_3D_firstorder_Kurtosis_T1	0	0	0	1	0	1
log_sigma_5_0_mm_3D_glcm_Imc1_T1	0	1	0	0	0	1
log_sigma_5_0_mm_3D_glcm_JointEnergy_T1	0	0	0	0	1	1
log_sigma_5_0_mm_3D_gldm_LargeDependenceLowGrayLevelEmphasis_FLAIR	0	0	0	1	0	1
log_sigma_5_0_mm_3D_glszm_SmallAreaHighGrayLevelEmphasis_FLAIR	0	0	1	0	0	1
log_sigma_5_0_mm_3D_glszm_ZoneEntropy_FLAIR	0	0	0	0	1	1
original_firstorder_Skewness_FLAIR	0	0	0	1	0	1
original_glszm_HighGrayLevelZoneEmphasis_T1	0	0	1	0	0	1
wavelet_HHH_glcm_Correlation_FLAIR	0	0	0	0	1	1
wavelet_HHH_glcm_Imc1_T1	0	0	0	1	0	1
wavelet_HHH_glszm_GrayLevelNonUniformity_FLAIR	0	0	0	1	0	1
wavelet_HHH_glszm_GrayLevelVariance_FLAIR	0	0	0	0	1	1
wavelet_HHH_glszm_GrayLevelVariance_T1	0	0	0	1	0	1
wavelet_HHL_firstorder_Median_FLAIR	0	0	0	0	1	1
wavelet_HHL_firstorder_Minimum_T1	0	0	1	0	0	1
wavelet_HHL_glcm_Imc1_FLAIR	0	0	0	1	0	1
wavelet_HHL_gldm_DependenceNonUniformityNormalized_FLAIR	0	0	0	0	1	1
wavelet_HHL_gldm_HighGrayLevelEmphasis_T1	0	0	1	0	0	1
wavelet_HHL_glrlm_ShortRunHighGrayLevelEmphasis_FLAIR	0	0	0	1	0	1
wavelet_HHL_glszm_GrayLevelNonUniformityNormalized_FLAIR	0	0	0	0	1	1
wavelet_HHL_glszm_SizeZoneNonUniformity_FLAIR	0	0	1	0	0	1
wavelet_HLH_glcm_ClusterShade_T1	0	0	0	1	0	1
wavelet_HLH_glcm_Correlation_T1	0	0	0	1	0	1
wavelet_HLL_firstorder_RobustMeanAbsoluteDeviation_T1	0	0	1	0	0	1
wavelet_HLL_glrlm_LongRunHighGrayLevelEmphasis_FLAIR	0	0	0	1	0	1
wavelet_HLL_glrlm_LongRunLowGrayLevelEmphasis_T1	0	0	0	1	0	1
wavelet_LHH_firstorder_Skewness_T1	0	0	0	1	0	1
wavelet_LHH_firstorder_Variance_FLAIR	0	0	0	1	0	1
wavelet_LHH_glcm_Imc2_T1	0	0	0	1	0	1
wavelet_LHH_gldm_DependenceNonUniformity_T1	0	0	0	1	0	1
wavelet_LHH_glszm_SizeZoneNonUniformity_FLAIR	0	0	0	1	0	1
wavelet_LHH_glszm_SmallAreaLowGrayLevelEmphasis_T1	0	0	0	0	1	1
wavelet_LHL_gldm_DependenceEntropy_T1	0	0	0	0	1	1
wavelet_LHL_glrlm_RunEntropy_T1	0	0	0	0	1	1
wavelet_LLH_firstorder_Range_T1	0	0	0	0	1	1
wavelet_LLH_glrlm_LongRunEmphasis_FLAIR	0	0	0	1	0	1
wavelet_LLL_firstorder_Minimum_FLAIR	0	0	1	0	0	1
wavelet_LLL_glcm_ClusterProminence_T1	0	0	0	0	1	1
wavelet_LLL_gldm_SmallDependenceLowGrayLevelEmphasis_FLAIR	0	0	0	1	0	1
wavelet_LLL_glszm_GrayLevelNonUniformityNormalized_FLAIR	0	0	0	0	1	1
wavelet_LLL_glszm_SmallAreaHighGrayLevelEmphasis_T1	0	0	1	0	0	1
log_sigma_1_0_mm_3D_glcm_ClusterShade_T1	0	0	0	1	0	1
log_sigma_1_0_mm_3D_glcm_Correlation_T1	0	0	0	0	1	1
log_sigma_1_0_mm_3D_glcm_JointEnergy_T1	0	0	0	0	1	1
log_sigma_1_0_mm_3D_glcm_MaximumProbability_T1	0	0	0	1	0	1
log_sigma_1_0_mm_3D_gldm_DependenceVariance_T1	0	0	0	1	0	1
log_sigma_1_0_mm_3D_gldm_LargeDependenceHighGrayLevelEmphasis_T1	0	0	0	0	1	1
log_sigma_1_0_mm_3D_gldm_SmallDependenceHighGrayLevelEmphasis_T1	0	0	0	0	1	1
log_sigma_1_0_mm_3D_glrlm_ShortRunLowGrayLevelEmphasis_T1	0	0	0	1	0	1
log_sigma_1_0_mm_3D_glszm_GrayLevelNonUniformityNormalized_T1	0	0	0	0	1	1
log_sigma_1_0_mm_3D_glszm_SizeZoneNonUniformityNormalized_FLAIR	0	0	0	1	0	1
log_sigma_1_0_mm_3D_glszm_SmallAreaHighGrayLevelEmphasis_T1	0	0	0	1	0	1
log_sigma_2_0_mm_3D_firstorder_Kurtosis_FLAIR	0	0	0	1	0	1
log_sigma_2_0_mm_3D_firstorder_Variance_T1	0	0	0	0	1	1
log_sigma_2_0_mm_3D_glcm_ClusterProminence_T1	0	1	0	0	0	1
log_sigma_2_0_mm_3D_gldm_LargeDependenceLowGrayLevelEmphasis_T1	0	0	0	0	1	1
log_sigma_2_0_mm_3D_glszm_GrayLevelNonUniformityNormalized_T1	0	0	0	1	0	1
log_sigma_2_0_mm_3D_glszm_SmallAreaEmphasis_FLAIR	0	0	0	1	0	1
log_sigma_2_0_mm_3D_glszm_SmallAreaHighGrayLevelEmphasis_FLAIR	0	0	0	1	0	1
log_sigma_3_0_mm_3D_glcm_DifferenceVariance_FLAIR	0	0	0	0	1	1
log_sigma_3_0_mm_3D_glcm_Id_T1	0	0	0	0	1	1
log_sigma_3_0_mm_3D_glcm_Idm_T1	0	0	0	0	1	1
log_sigma_3_0_mm_3D_glcm_Idn_T1	0	0	0	0	1	1
log_sigma_3_0_mm_3D_glcm_Imc2_T1	0	0	0	1	0	1
log_sigma_3_0_mm_3D_glcm_InverseVariance_T1	0	0	0	1	0	1
log_sigma_3_0_mm_3D_glcm_JointEntropy_T1	0	0	0	0	1	1
log_sigma_3_0_mm_3D_glszm_ZoneEntropy_T1	0	0	0	0	1	1
log_sigma_4_0_mm_3D_glcm_ClusterShade_FLAIR	0	1	0	0	0	1
log_sigma_4_0_mm_3D_gldm_DependenceEntropy_T1	0	0	0	0	1	1
log_sigma_4_0_mm_3D_gldm_LargeDependenceLowGrayLevelEmphasis_FLAIR	0	0	0	0	1	1
log_sigma_4_0_mm_3D_glszm_SizeZoneNonUniformity_FLAIR	0	0	0	1	0	1
log_sigma_4_0_mm_3D_glszm_SizeZoneNonUniformity_T1	0	0	0	1	0	1
log_sigma_4_0_mm_3D_glszm_SmallAreaLowGrayLevelEmphasis_T1	0	0	0	1	0	1
log_sigma_5_0_mm_3D_firstorder_Maximum_T1	0	0	0	1	0	1
log_sigma_5_0_mm_3D_firstorder_Variance_T1	0	1	0	0	0	1
log_sigma_5_0_mm_3D_glcm_ClusterShade_FLAIR	0	0	1	0	0	1
log_sigma_5_0_mm_3D_glcm_ClusterTendency_FLAIR	0	0	0	0	1	1
log_sigma_5_0_mm_3D_glcm_DifferenceEntropy_T1	0	0	1	0	0	1
log_sigma_5_0_mm_3D_glcm_Imc2_FLAIR	0	0	0	0	1	1
log_sigma_5_0_mm_3D_glcm_Imc2_T1	0	1	0	0	0	1
log_sigma_5_0_mm_3D_glcm_InverseVariance_T1	0	0	0	1	0	1
log_sigma_5_0_mm_3D_glrlm_HighGrayLevelRunEmphasis_FLAIR	0	0	0	0	1	1
log_sigma_5_0_mm_3D_glszm_GrayLevelNonUniformity_T1	0	0	0	0	1	1
log_sigma_5_0_mm_3D_glszm_HighGrayLevelZoneEmphasis_T1	0	0	0	1	0	1
log_sigma_5_0_mm_3D_glszm_SmallAreaHighGrayLevelEmphasis_T1	0	0	0	0	1	1
log_sigma_5_0_mm_3D_glszm_ZoneEntropy_T1	0	0	0	1	0	1
log_sigma_5_0_mm_3D_glszm_ZoneVariance_T1	0	0	0	0	1	1
original_firstorder_Median_T1	0	0	0	1	0	1
original_glcm_Imc2_T1	0	0	0	0	1	1
original_gldm_SmallDependenceLowGrayLevelEmphasis_FLAIR	0	0	0	1	0	1
original_glrlm_LongRunHighGrayLevelEmphasis_T1	0	0	0	1	0	1
original_glszm_LowGrayLevelZoneEmphasis_FLAIR	0	0	0	1	0	1
original_glszm_LowGrayLevelZoneEmphasis_T1	0	0	0	0	1	1
original_glszm_ZoneEntropy_FLAIR	0	0	0	1	0	1
original_glszm_ZoneEntropy_T1	0	0	0	1	0	1
original_shape_LeastAxisLength_T1	0	0	0	1	0	1
original_shape_Sphericity_T1	0	0	0	1	0	1
wavelet_HHH_firstorder_10Percentile_FLAIR	0	0	1	0	0	1
wavelet_HHH_firstorder_Energy_FLAIR	0	0	1	0	0	1
wavelet_HHH_firstorder_Median_FLAIR	0	0	0	1	0	1
wavelet_HHH_firstorder_Minimum_T1	0	0	0	1	0	1
wavelet_HHH_firstorder_Variance_FLAIR	0	0	0	1	0	1
wavelet_HHH_gldm_DependenceVariance_FLAIR	0	0	0	0	1	1
wavelet_HHH_glrlm_GrayLevelNonUniformityNormalized_T1	0	0	0	1	0	1
wavelet_HHH_glrlm_ShortRunLowGrayLevelEmphasis_T1	0	0	0	1	0	1
wavelet_HHH_glszm_HighGrayLevelZoneEmphasis_T1	0	0	0	0	1	1
wavelet_HHH_glszm_SmallAreaHighGrayLevelEmphasis_FLAIR	0	0	0	1	0	1
wavelet_HHH_glszm_ZoneEntropy_FLAIR	0	0	0	1	0	1
wavelet_HHL_firstorder_Median_T1	0	0	0	1	0	1
wavelet_HHL_glcm_Imc2_FLAIR	0	0	0	1	0	1
wavelet_HHL_glcm_InverseVariance_T1	0	0	0	1	0	1
wavelet_HHL_glrlm_ShortRunHighGrayLevelEmphasis_T1	0	0	0	0	1	1
wavelet_HHL_glszm_HighGrayLevelZoneEmphasis_FLAIR	0	0	0	1	0	1
wavelet_HHL_glszm_SizeZoneNonUniformity_T1	0	0	0	1	0	1
wavelet_HHL_glszm_SmallAreaEmphasis_FLAIR	0	0	0	0	1	1
wavelet_HHL_glszm_SmallAreaLowGrayLevelEmphasis_FLAIR	0	0	0	0	1	1
wavelet_HHL_glszm_ZoneEntropy_FLAIR	0	0	0	1	0	1
wavelet_HLH_firstorder_InterquartileRange_FLAIR	0	0	1	0	0	1
wavelet_HLH_firstorder_Kurtosis_T1	0	0	1	0	0	1
wavelet_HLH_firstorder_Maximum_T1	0	0	0	1	0	1
wavelet_HLH_glcm_InverseVariance_FLAIR	0	0	0	1	0	1
wavelet_HLH_gldm_LargeDependenceLowGrayLevelEmphasis_FLAIR	0	0	1	0	0	1
wavelet_HLH_gldm_LargeDependenceLowGrayLevelEmphasis_T1	0	0	0	0	1	1
wavelet_HLH_glszm_SmallAreaHighGrayLevelEmphasis_FLAIR	0	0	0	0	1	1
wavelet_HLL_firstorder_10Percentile_T1	0	0	1	0	0	1
wavelet_HLL_firstorder_Energy_FLAIR	0	0	0	1	0	1
wavelet_HLL_firstorder_Energy_T1	0	0	0	1	0	1
wavelet_HLL_firstorder_MeanAbsoluteDeviation_T1	0	0	1	0	0	1
wavelet_HLL_firstorder_Median_FLAIR	0	1	0	0	0	1
wavelet_HLL_glcm_ClusterProminence_T1	0	0	0	1	0	1
wavelet_HLL_glcm_Correlation_T1	0	0	0	1	0	1
wavelet_HLL_gldm_DependenceEntropy_FLAIR	0	0	0	0	1	1
wavelet_HLL_glszm_HighGrayLevelZoneEmphasis_T1	0	0	0	0	1	1
wavelet_HLL_glszm_LowGrayLevelZoneEmphasis_FLAIR	0	0	0	1	0	1
wavelet_HLL_glszm_SizeZoneNonUniformity_T1	0	0	0	1	0	1
wavelet_HLL_glszm_SmallAreaEmphasis_FLAIR	0	0	0	0	1	1
wavelet_LHH_firstorder_10Percentile_FLAIR	0	1	0	0	0	1
wavelet_LHH_firstorder_Mean_FLAIR	0	0	1	0	0	1
wavelet_LHH_firstorder_Median_T1	0	0	0	1	0	1
wavelet_LHH_firstorder_Variance_T1	0	0	0	0	1	1
wavelet_LHH_glcm_Autocorrelation_FLAIR	0	0	1	0	0	1
wavelet_LHH_glcm_Correlation_FLAIR	0	0	0	1	0	1
wavelet_LHH_glrlm_HighGrayLevelRunEmphasis_T1	0	0	0	1	0	1
wavelet_LHH_glszm_GrayLevelNonUniformity_FLAIR	0	0	0	1	0	1
wavelet_LHH_glszm_HighGrayLevelZoneEmphasis_T1	0	0	0	1	0	1
wavelet_LHL_firstorder_Maximum_FLAIR	0	0	1	0	0	1
wavelet_LHL_glcm_Correlation_FLAIR	0	0	0	0	1	1
wavelet_LHL_gldm_LargeDependenceHighGrayLevelEmphasis_FLAIR	0	0	0	0	1	1
wavelet_LHL_gldm_LargeDependenceLowGrayLevelEmphasis_FLAIR	0	0	0	0	1	1
wavelet_LHL_glrlm_LongRunHighGrayLevelEmphasis_T1	0	1	0	0	0	1
wavelet_LHL_glrlm_LongRunLowGrayLevelEmphasis_T1	0	0	0	1	0	1
wavelet_LHL_glszm_GrayLevelNonUniformityNormalized_T1	0	0	0	0	1	1
wavelet_LHL_glszm_LowGrayLevelZoneEmphasis_T1	0	0	0	1	0	1
wavelet_LHL_glszm_SizeZoneNonUniformityNormalized_T1	0	0	0	1	0	1
wavelet_LHL_glszm_SmallAreaEmphasis_FLAIR	0	0	0	0	1	1
wavelet_LHL_glszm_ZoneEntropy_T1	0	0	0	1	0	1
wavelet_LLH_gldm_DependenceEntropy_FLAIR	0	0	0	0	1	1
wavelet_LLH_glszm_GrayLevelNonUniformityNormalized_T1	0	0	0	0	1	1
wavelet_LLH_glszm_LowGrayLevelZoneEmphasis_FLAIR	0	0	0	1	0	1
wavelet_LLH_glszm_LowGrayLevelZoneEmphasis_T1	0	0	0	0	1	1
wavelet_LLH_glszm_SmallAreaEmphasis_FLAIR	0	0	0	0	1	1
wavelet_LLH_glszm_SmallAreaLowGrayLevelEmphasis_T1	0	0	0	1	0	1
wavelet_LLL_firstorder_Minimum_T1	0	0	0	1	0	1
wavelet_LLL_glcm_JointEnergy_T1	0	0	0	0	1	1
wavelet_LLL_glrlm_LongRunEmphasis_FLAIR	0	0	0	1	0	1
wavelet_LLL_glrlm_RunVariance_FLAIR	0	0	0	0	1	1
wavelet_LLL_glszm_LargeAreaHighGrayLevelEmphasis_T1	0	0	0	0	1	1
wavelet_LLL_glszm_LargeAreaLowGrayLevelEmphasis_FLAIR	0	0	0	1	0	1
wavelet_LLL_glszm_LowGrayLevelZoneEmphasis_FLAIR	0	0	0	0	1	1
wavelet_LLL_glszm_SmallAreaEmphasis_FLAIR	0	0	0	1	0	1
