# Supplementary material for: Development of A Radiomic Model for MGMT Promoter Methylation Detection in Glioblastoma Using Conventional MRI
Source: Int J Mol Sci. 2023 Dec 21;25(1):138. doi: 10.3390/ijms25010138 (PMC10778771; doi:10.3390/ijms25010138)
Supplement: Supplementary file 1 [file ijms-25-00138-s001.zip › Supplementary Table S5.xlsx]

## Sheet: WHOLE
WHOLE
Importance	Feature
100	wavelet_LLH_glrlm_LongRunHighGrayLevelEmphasis_FLAIR
59.8729	log_sigma_4_0_mm_3D_glszm_GrayLevelNonUniformityNormalized_FLAIR
56.121	log_sigma_3_0_mm_3D_glszm_LowGrayLevelZoneEmphasis_FLAIR
55.5452	wavelet_LHL_firstorder_Minimum_T1
54.7035	wavelet_HLH_firstorder_Median_T1
49.8201	wavelet_LHH_glrlm_GrayLevelVariance_FLAIR
45.4901	wavelet_LLL_glszm_HighGrayLevelZoneEmphasis_FLAIR
43.2777	wavelet_LLH_firstorder_90Percentile_FLAIR
40.2852	wavelet_LLH_firstorder_Variance_FLAIR
39.3487	log_sigma_5_0_mm_3D_glszm_GrayLevelNonUniformityNormalized_FLAIR
	Number of features
T1	2
FLAIR	8
FirstOrder	4
GLSZM	4
GLCM	0
GLDM	0
GLRLM	2
NGTDM	0
Original	0
Wavelet	7
Log	3

## Sheet: CE
CE
Importance	Feature
100	wavelet_LLL_glszm_SmallAreaHighGrayLevelEmphasis_FLAIR
74.0418	wavelet_LLH_firstorder_10Percentile_FLAIR
65.3248	wavelet_HHL_firstorder_Skewness_T1
55.4251	wavelet_HLH_glcm_Imc1_T1
55.1767	log_sigma_1_0_mm_3D_firstorder_Minimum_FLAIR
51.4241	wavelet_HHH_glszm_SizeZoneNonUniformity_FLAIR
51.2314	wavelet_LHL_glcm_ClusterShade_FLAIR
48.1082	wavelet_LLL_glszm_GrayLevelVariance_T1
48.0621	wavelet_HLH_firstorder_Mean_FLAIR
47.1822	log_sigma_3_0_mm_3D_glszm_SmallAreaLowGrayLevelEmphasis_FLAIR
	Number of features
T1	3
FLAIR	7
FirstOrder	4
GLSZM	4
GLCM	2
GLDM	0
GLRLM	0
NGTDM	0
Original	0
Wavelet	8
Log	2

## Sheet: NEC
NEC
Importance	Feature
100	wavelet_LLL_glszm_SmallAreaHighGrayLevelEmphasis_T1
83.9714	log_sigma_4_0_mm_3D_glcm_ClusterProminence_T1
83.8823	original_glcm_ClusterProminence_FLAIR
65.6315	wavelet_HLH_glszm_SmallAreaHighGrayLevelEmphasis_T1
58.5811	log_sigma_4_0_mm_3D_glszm_GrayLevelVariance_FLAIR
58.0933	wavelet_LLH_firstorder_Variance_FLAIR
50.1236	original_glszm_HighGrayLevelZoneEmphasis_T1
49.6719	log_sigma_2_0_mm_3D_glszm_GrayLevelNonUniformityNormalized_FLAIR
47.1471	wavelet_HLL_glszm_GrayLevelVariance_T1
44.2875	wavelet_LLL_firstorder_Minimum_FLAIR
	Number of features
T1	5
FLAIR	5
FirstOrder	2
GLSZM	6
GLCM	2
GLDM	0
GLRLM	0
NGTDM	0
Original	2
Wavelet	5
Log	3

## Sheet: HYP
HYP
Importance	Feature
100	wavelet_LLH_firstorder_Skewness_FLAIR
87.4488	wavelet_HHH_glcm_ClusterShade_T1
77.6407	wavelet_HLH_glszm_SizeZoneNonUniformity_FLAIR
74.5497	log_sigma_2_0_mm_3D_glszm_SmallAreaHighGrayLevelEmphasis_T1
59.9958	log_sigma_3_0_mm_3D_glszm_HighGrayLevelZoneEmphasis_FLAIR
58.9296	log_sigma_4_0_mm_3D_glszm_SizeZoneNonUniformity_FLAIR
57.7792	log_sigma_4_0_mm_3D_glszm_GrayLevelNonUniformityNormalized_FLAIR
56.6761	wavelet_HHH_firstorder_Median_T1
55.5069	wavelet_HLH_firstorder_Skewness_FLAIR
52.523	wavelet_LLH_glcm_ClusterShade_FLAIR
	Number of features
T1	3
FLAIR	7
FirstOrder	3
GLSZM	5
GLCM	2
GLDM	0
GLRLM	0
NGTDM	0
Original	0
Wavelet	6
Log	4

## Sheet: TUM
TUM
Importance	Feature
100	wavelet_HHL_firstorder_Skewness_T1
77.7804	wavelet_LLH_firstorder_10Percentile_FLAIR
60.324	original_firstorder_Kurtosis_FLAIR
49.8104	wavelet_HHH_glcm_Correlation_FLAIR
41.3185	log_sigma_2_0_mm_3D_gldm_LargeDependenceLowGrayLevelEmphasis_T1
38.0919	wavelet_HLH_firstorder_Maximum_FLAIR
34.7042	wavelet_HHH_glszm_SizeZoneNonUniformity_T1
30.9321	wavelet_LLH_firstorder_Mean_FLAIR
30.8434	wavelet_HLL_glcm_Imc1_FLAIR
29.3059	original_glszm_SmallAreaHighGrayLevelEmphasis_FLAIR
	Number of features
T1	3
FLAIR	7
FirstOrder	5
GLSZM	2
GLCM	2
GLDM	1
GLRLM	0
NGTDM	0
Original	2
Wavelet	7
Log	1

## Sheet: CE+NEC
CE + NEC
Importance	Feature
100	wavelet_LHH_firstorder_Variance_FLAIR_ce
91.487	wavelet_LLH_firstorder_MeanAbsoluteDeviation_FLAIR_nec
78.1415	log_sigma_2_0_mm_3D_glszm_GrayLevelNonUniformityNormalized_FLAIR_nec
77.0697	log_sigma_4_0_mm_3D_glszm_GrayLevelVariance_FLAIR_nec
71.8189	wavelet_HHL_firstorder_Skewness_T1_ce
70.0103	wavelet_LLH_firstorder_Variance_FLAIR_nec
69.5923	wavelet_HLH_glcm_InverseVariance_T1_ce
69.5485	log_sigma_4_0_mm_3D_glcm_ClusterProminence_T1_nec
68.6355	original_glszm_HighGrayLevelZoneEmphasis_T1_nec
66.8509	log_sigma_1_0_mm_3D_firstorder_Maximum_T1_nec
	Number of features
T1	5
FLAIR	5
FirstOrder	5
GLSZM	3
GLCM	2
GLDM	0
GLRLM	0
NGTDM	0
Original	1
Wavelet	5
Log	4
CE	3
NEC	7

## Sheet: CE+NEC+HYP
CE + NEC + HYP
Importance	Feature
100	log_sigma_3_0_mm_3D_firstorder_Maximum_FLAIR_nec
43.4744	wavelet_LLL_glszm_SmallAreaHighGrayLevelEmphasis_T1_nec
32.101	log_sigma_4_0_mm_3D_glcm_ClusterProminence_T1_nec
30.9132	log_sigma_2_0_mm_3D_glszm_SmallAreaHighGrayLevelEmphasis_T1_hyp
28.5402	log_sigma_1_0_mm_3D_firstorder_Minimum_FLAIR_ce
25.8628	log_sigma_4_0_mm_3D_glszm_GrayLevelNonUniformityNormalized_FLAIR_hyp
25.422	wavelet_HHL_firstorder_Skewness_T1_nec
25.2298	original_glrlm_RunEntropy_T1_hyp
24.5105	wavelet_LHL_glcm_ClusterShade_FLAIR_ce
23.2941	wavelet_LHH_glrlm_ShortRunLowGrayLevelEmphasis_FLAIR_ce
	Number of features
T1	5
FLAIR	5
FirstOrder	3
GLSZM	3
GLCM	2
GLDM	0
GLRLM	2
NGTDM	0
Original	1
Wavelet	4
Log	5
CE	3
NEC	4
HYP	3

## Sheet: TUM+HYP
TUM + HYP
Importance	Feature
100	wavelet_HHL_firstorder_Skewness_T1_tum
58.8316	wavelet_HLH_glszm_SizeZoneNonUniformity_FLAIR_hyp
52.2117	wavelet_HHH_glcm_ClusterShade_T1_hyp
49.089	wavelet_LHH_glrlm_ShortRunLowGrayLevelEmphasis_FLAIR_tum
47.9227	wavelet_LLL_glszm_GrayLevelNonUniformityNormalized_FLAIR_tum
47.5973	wavelet_LLH_firstorder_10Percentile_FLAIR_tum
47.4597	wavelet_LHL_glszm_SmallAreaLowGrayLevelEmphasis_T1_tum
47.0799	wavelet_LLH_firstorder_Skewness_FLAIR_hyp
45.8729	original_glrlm_RunEntropy_T1_hyp
41.7316	wavelet_HLH_firstorder_Maximum_FLAIR_tum
	Number of features
T1	4
FLAIR	6
FirstOrder	4
GLSZM	3
GLCM	1
GLDM	0
GLRLM	2
NGTDM	0
Original	1
Wavelet	9
Log	0
TUM	6
HYP	4
